# Supplementary material for: 2-Methyloxolane as a Bio-Based Solvent for Green Extraction of Aromas from Hops (Humulus lupulus L.)
Source: MDPI journal article supplement (doi:10.3390/molecules25071727), 2020-04-09
Supplement: s1 [file s1]

# Supplementary materials

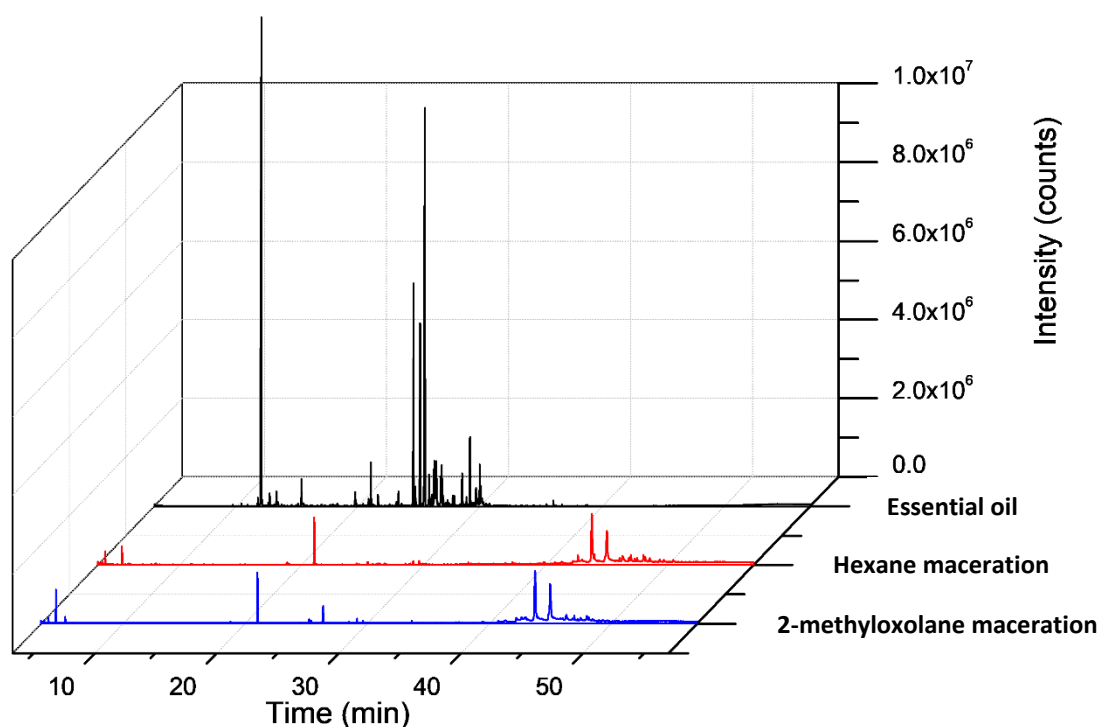

**Figure S1 – GC-MS chromatograms of essential oil (top), hexane maceration (middle) and 2-methyloxolane (bottom) maceration extracts.**
